# Supplementary material for: Risperidone Exacerbates Glucose Intolerance, Nonalcoholic Fatty Liver Disease, and Renal Impairment in Obese Mice
Source: Int J Mol Sci. 2021 Jan 2;22(1):409. doi: 10.3390/ijms22010409 (PMC7795724; doi:10.3390/ijms22010409)
Supplement: Supplementary file 1 [file ijms-22-00409-s001.pdf]

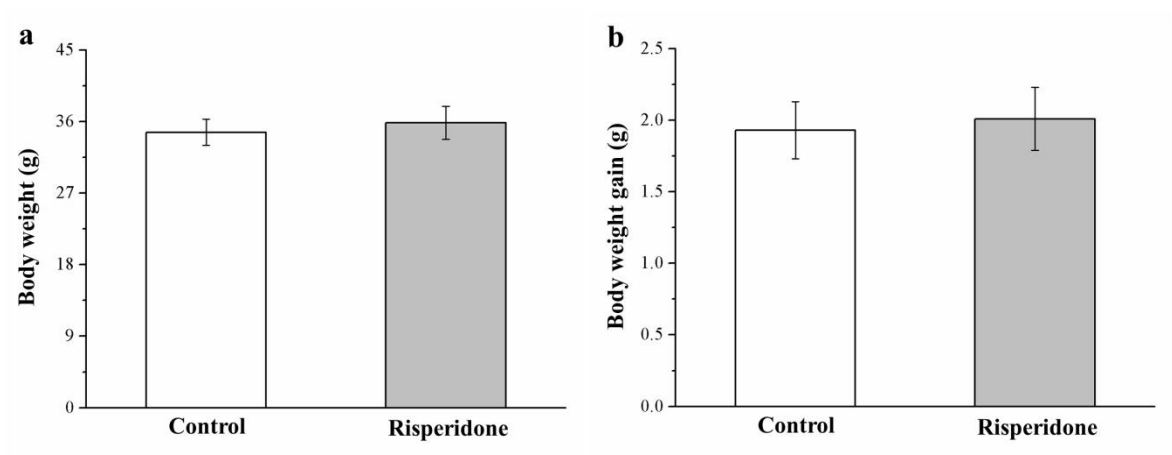

**Figure S1.** Changes in body weight and weekly body weight gain measured in control and 1 mg/kg/day risperidone-treated SD-fed mice over the 56-day period.

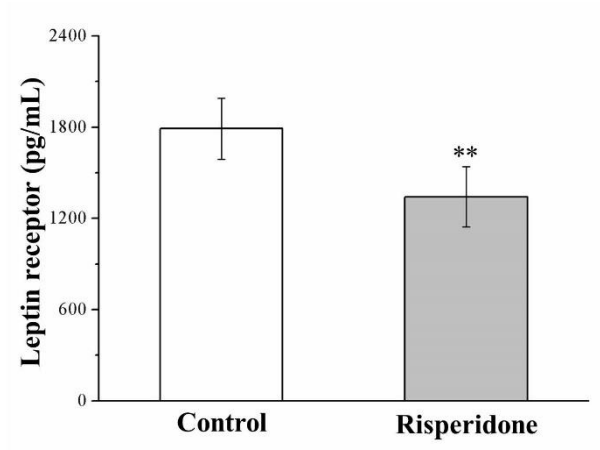

**Figure S2.** Changes in serum soluble leptin receptor levels measured in control and 1 mg/kg/day risperidone-treated obese mice over the 56-day period. \*\* $P < 0.01$ .

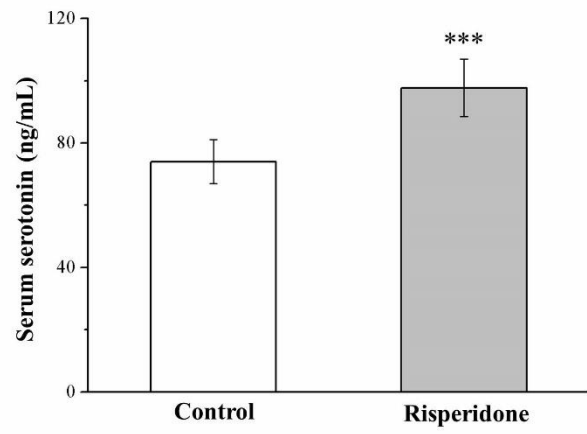

**Figure S3.** Changes in serum serotonin levels measured in control and 1 mg/kg/day risperidone-treated obese mice over the 56-day period. \*\*\* $P < 0.001$ .

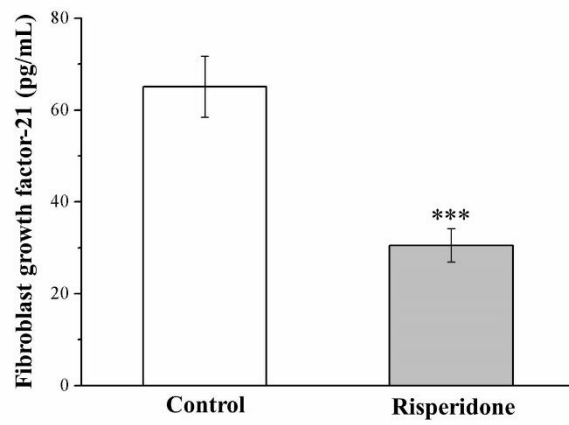

**Figure S4.** Changes in serum FGF-21 levels measured in control and 1 mg/kg/day risperidone-treated obese mice over a 56-day period. \*\*\* $P < 0.001$ .

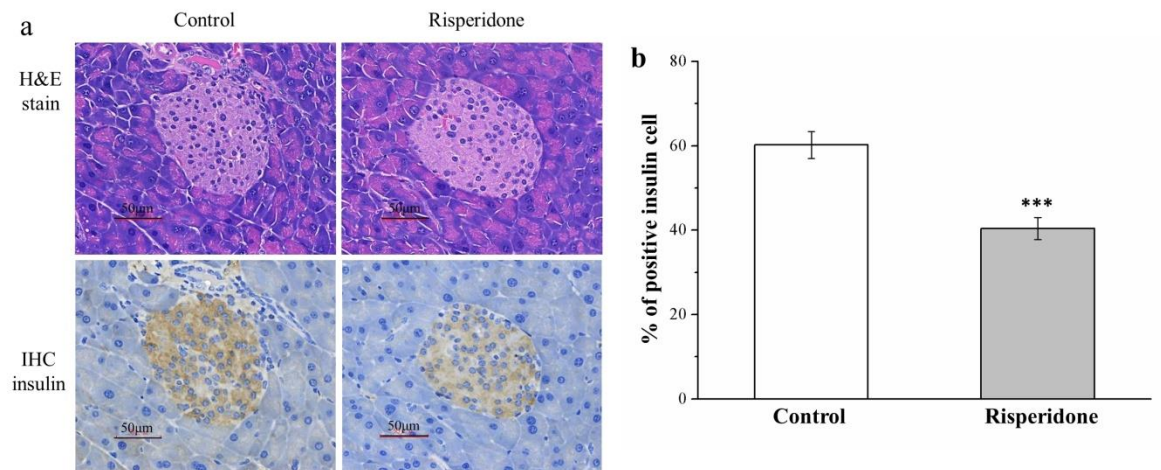

**Figure S5.** Changes in (a) islet morphology (H&E stain and immunohistochemical stain; 200 $\times$  magnification) and (b)  $\beta$ -cell percentage measured in control and 1 mg/kg/day risperidone-treated obese mice over a 56-day period. \*\*\* $P < 0.001$ .

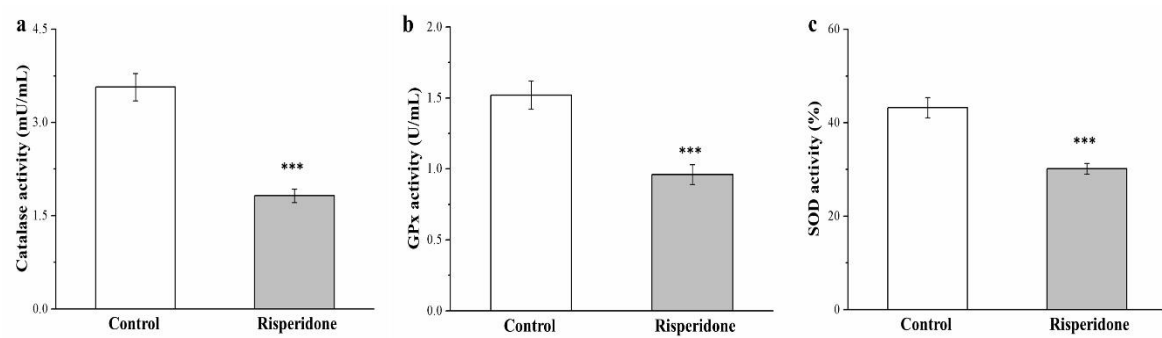

**Figure S6.** Changes in pancreatic (a) catalase, (b) GPx, and (c) SOD activities in the 1 mg/kg/day risperidone treatment and control groups over the 56-day treatment period. \*\*\* $P < 0.001$ .

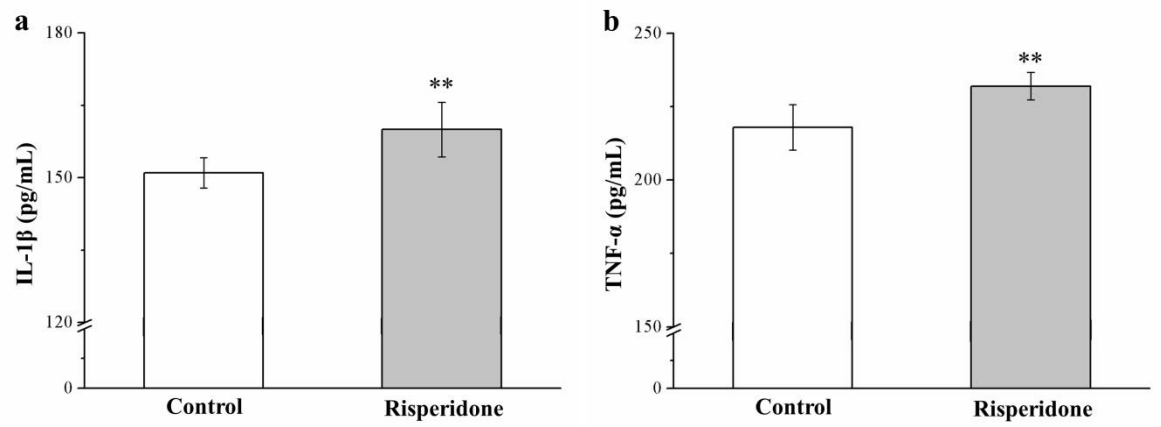

**Figure S7.** Changes in the serum levels of (a) TNF- $\alpha$  and (b) IL-1 $\beta$  measured in control and 1 mg/kg/day risperidone-treated obese mice over a 56-day period. \*\* $P < 0.01$ .

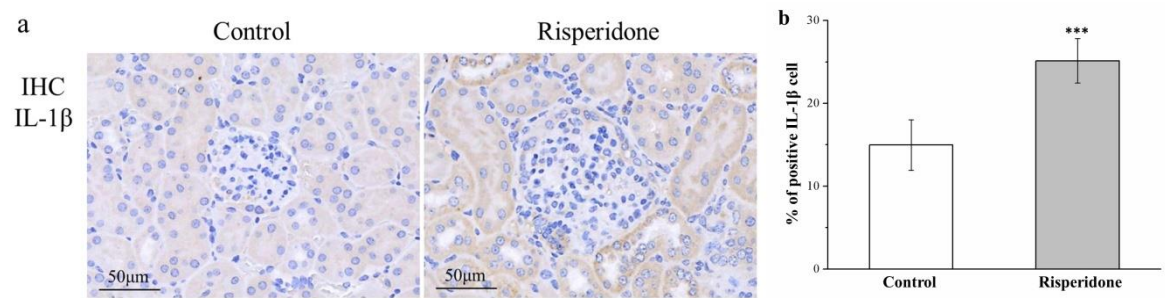

**Figure S8.** Changes in (a) immunohistochemical stain (200 $\times$  magnification) and (b) kidney levels of IL-1 $\beta$  measured in control and 1 mg/kg/day risperidone-treated obese mice over a 56-day period. \*\*\* $P < 0.001$ .
